# Supplementary material for: Metal–organic framework-derived CoSe2/(NiCo)Se2 box-in-box hollow nanocubes with enhanced electrochemical properties for sodium-ion storage and hydrogen evolution
Source: Royal Society of Chemistry journal article supplement (doi:10.1039/c7ta05571d), 2017-01-01
Supplement: c7ta05571d1.pdf [file c7ta05571d1.pdf]

## Supporting Information

### **Metal-organic framework-derived CoSe<sub>2</sub>/(NiCo)Se<sub>2</sub> box-in-box hollow nanocubes with enhanced electrochemical properties for sodium-ion storage and hydrogen evolution**

Seung-Keun Park,<sup>a</sup> Jin Koo Kim,<sup>a</sup> and Yun Chan Kang<sup>\*a</sup>

<sup>a</sup>Department of Materials Science and Engineering, Korea University, Anam-Dong, Seongbuk-Gu, Seoul 136-713, Republic of Korea.

E-mail: yckang@korea.ac.kr (Yun Chan Kang, Fax: (+82) 2-928-3584)

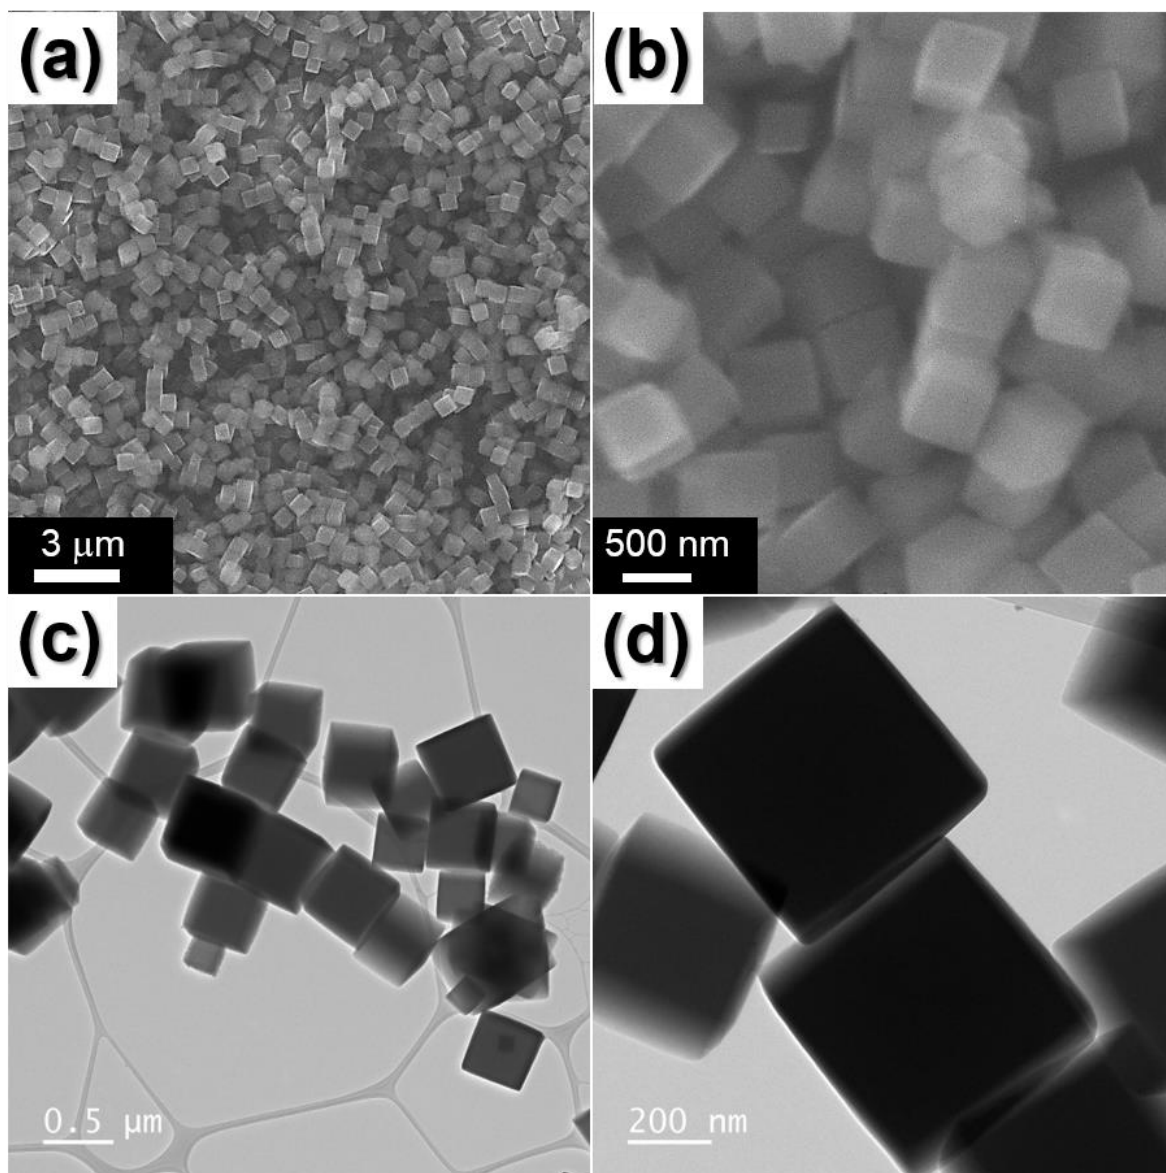

**Fig. S1** Morphologies of the bare ZIF-67 nanocubes: (a) and (b) SEM and (c) and (d) TEM images.

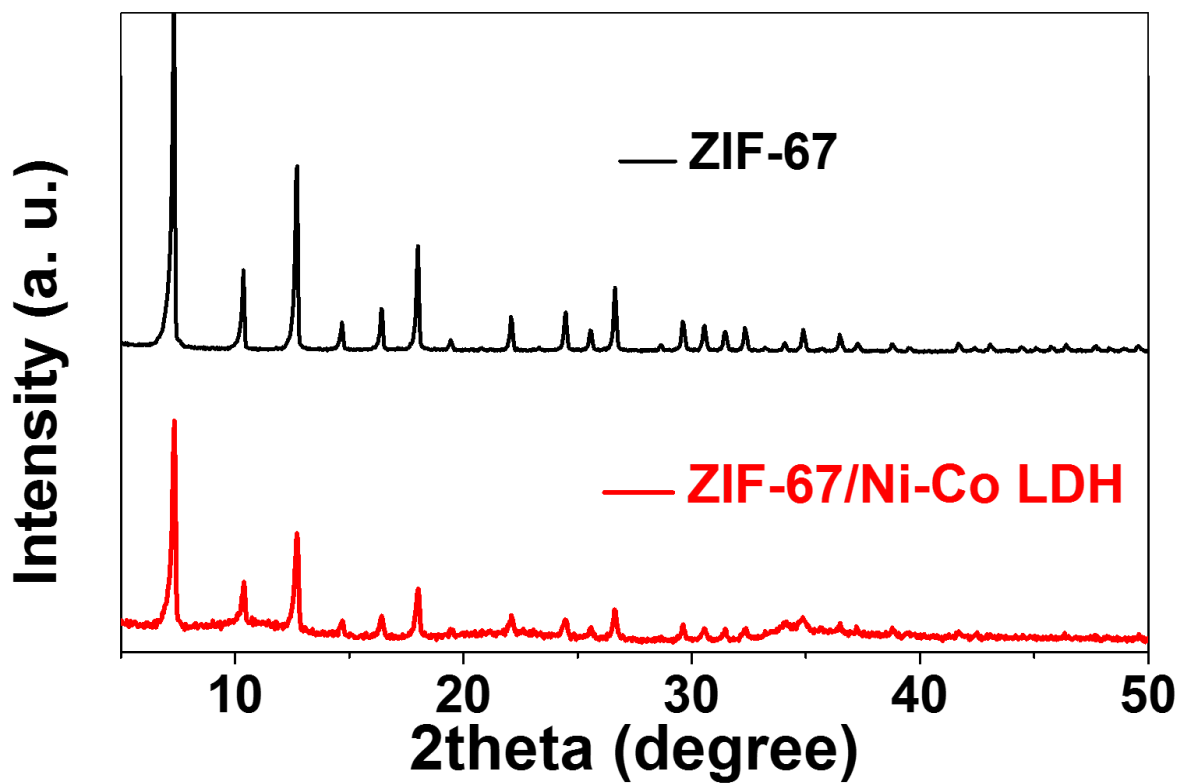

Fig. S2 XRD patterns of the ZIF-67 and ZIF-67/Ni-Co LDH nanocubes.

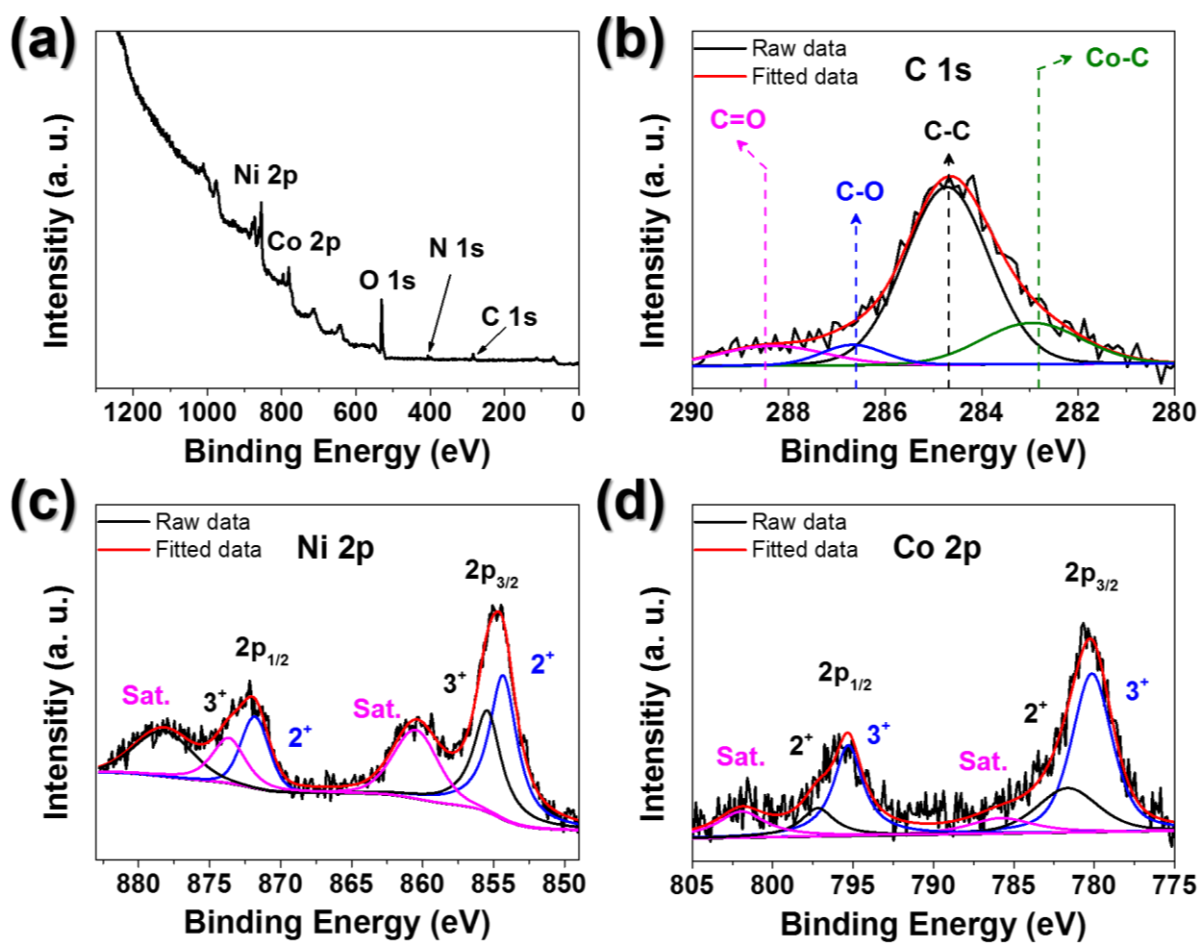

**Fig. S3** XPS spectra of the ZIF-67/Ni-Co LDH yolk-shell nanocubes: (a) survey scan, (b) C 1s, (c) Ni 2p, and (d) Co 2p.

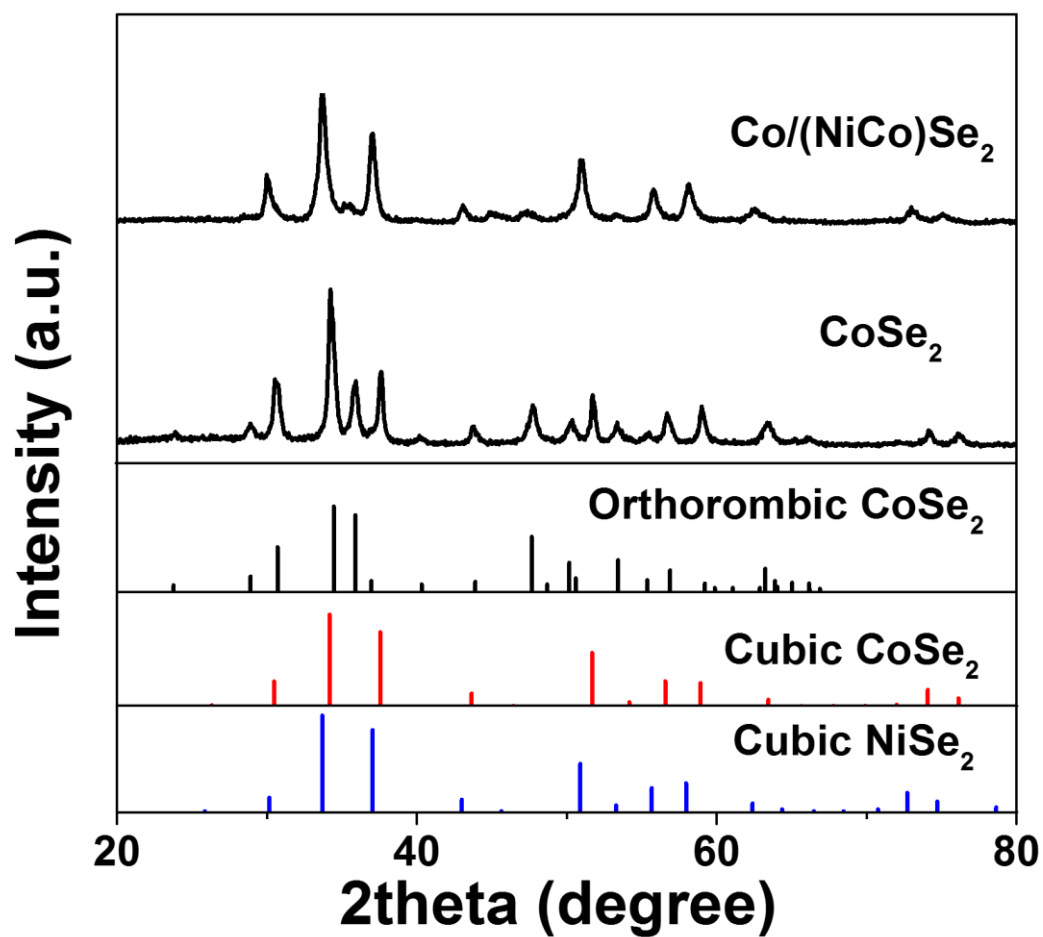

**Fig. S4** XRD patterns of the Co/(NiCo)Se<sub>2</sub> and CoSe<sub>2</sub> nanocubes.

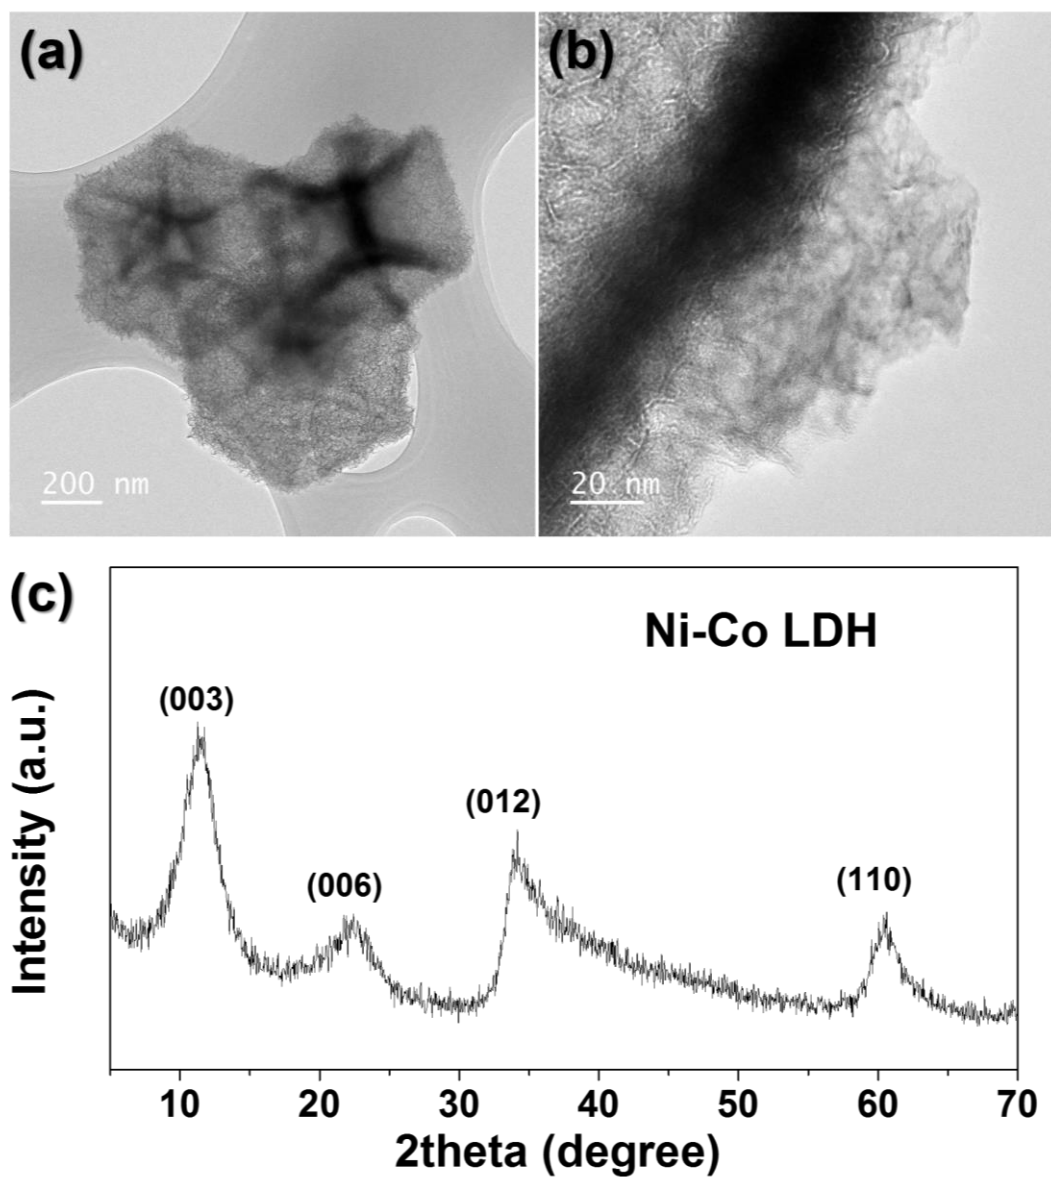

**Fig. S5** (a) Low resolution, (b) high resolution TEM images and (c) XRD pattern of fully hollowed Ni-Co LDH nanocubes.

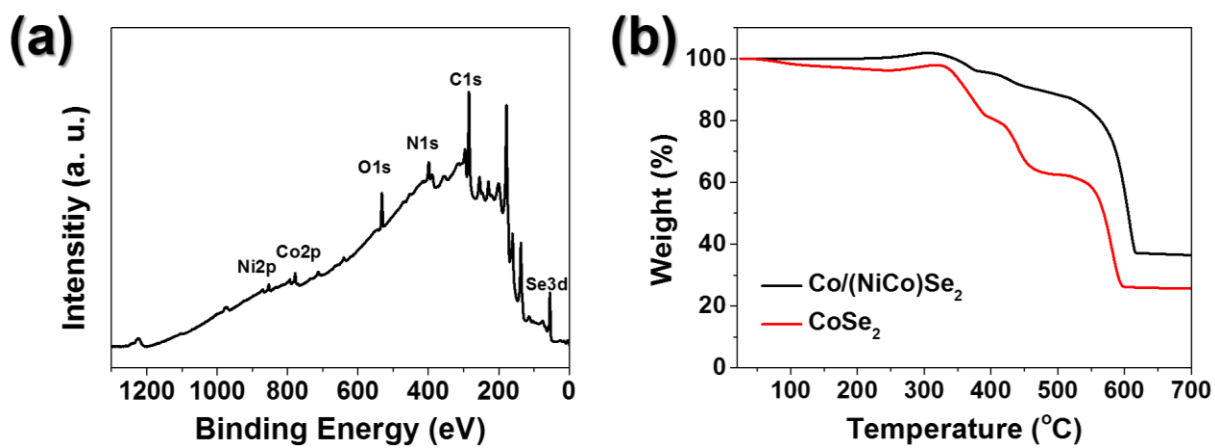

**Fig. S6** (a) XPS survey scan of Co/(NiCo)Se<sub>2</sub> nanocubes and (b) TGA curves of the Co/(NiCo)Se<sub>2</sub> and CoSe<sub>2</sub> nanocubes.

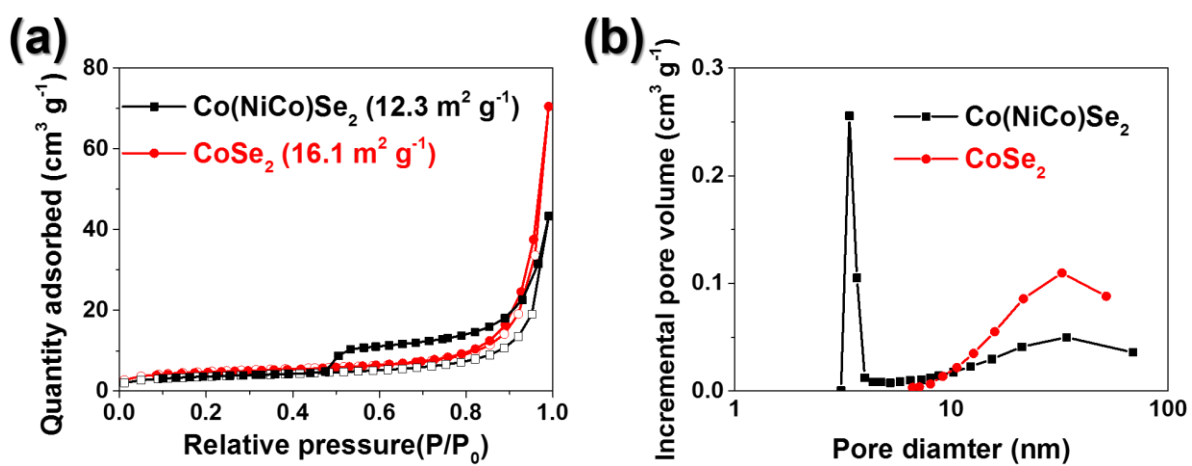

**Fig. S7** (a)  $N_2$  adsorption and desorption isotherms and (b) BJH pore size distributions of the nanocubes.



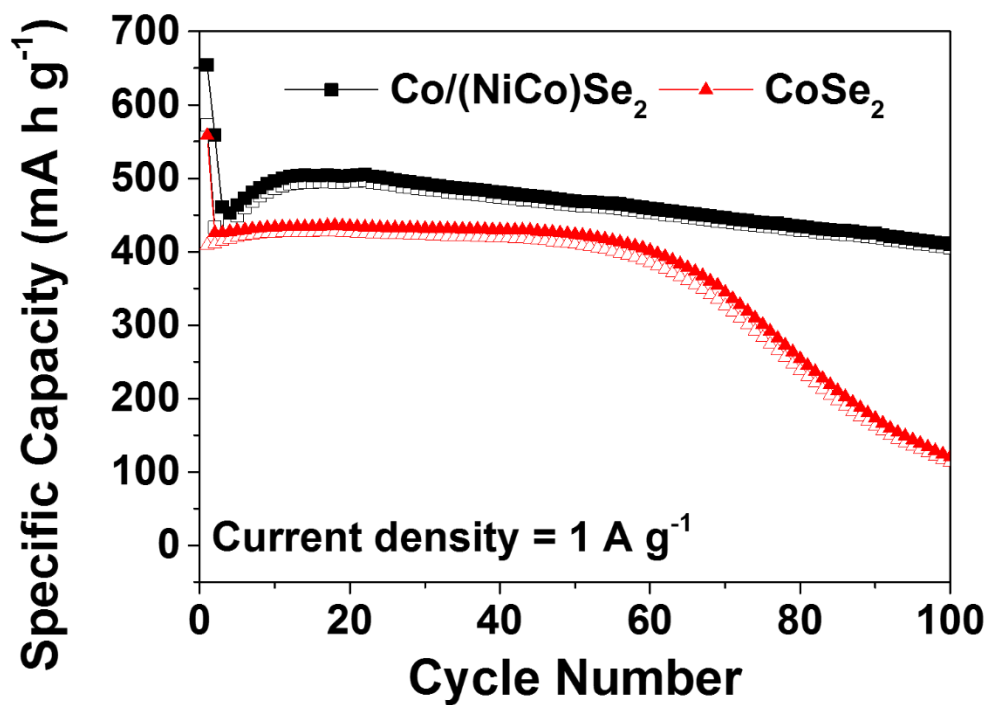

**Fig. S8** Cycling performances of the Co/(NiCo)Se<sub>2</sub> and CoSe<sub>2</sub> nanocubes at a current density of 1 A g<sup>-1</sup>.

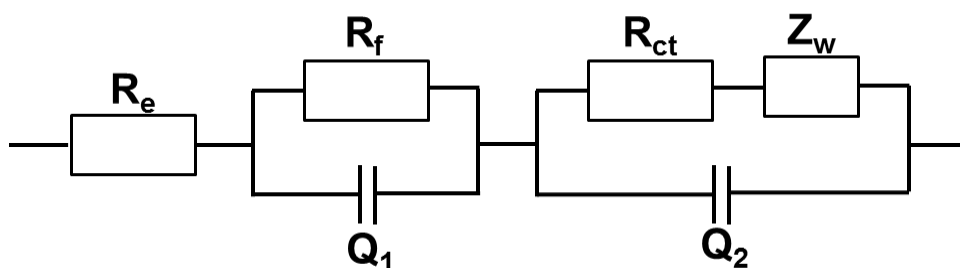

$R_e$ : the electrolyte resistance, corresponding to the intercept of high frequency semicircle at  $Z_{re}$  axis

$R_f$ : the SEI layer resistance corresponding to the high-frequency semicircle

$Q_1$ : the dielectric relaxation capacitance corresponding to the high-frequency semicircle

$R_{ct}$ : the denote the charger transfer resistance related to the middle-frequency semicircle

$Q_2$ : the associated double-layer capacitance related to the middle-frequency semicircle

$Z_w$ : the Na-ion diffusion resistance

**Fig. S9** Randle-type equivalent circuit model used for AC impedance fitting.

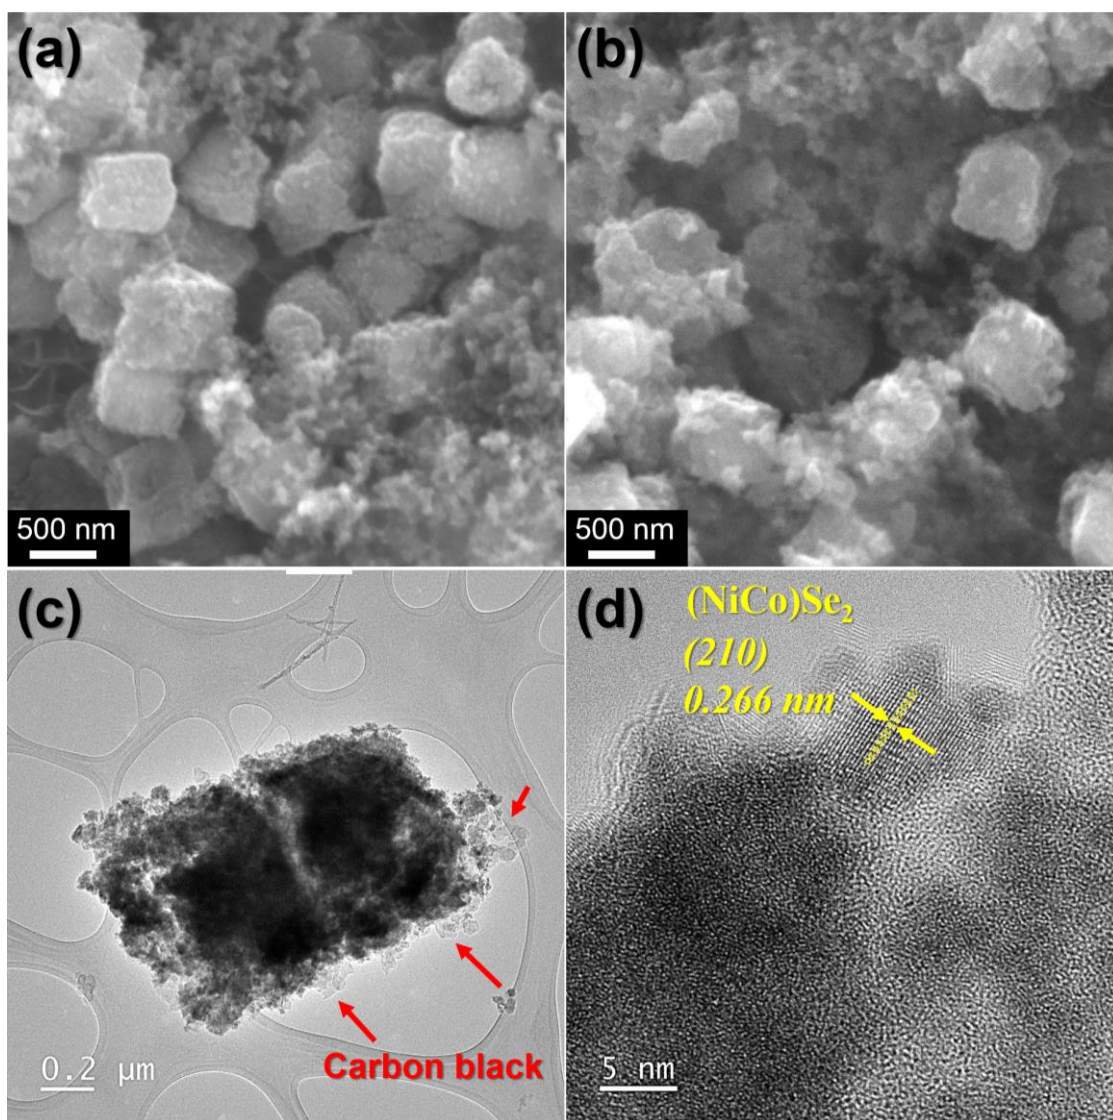

**Fig. S10** (a, b) SEM and (c, d) TEM images of the Co/(NiCo)Se<sub>2</sub> nanocubes obtained after 80 cycles.

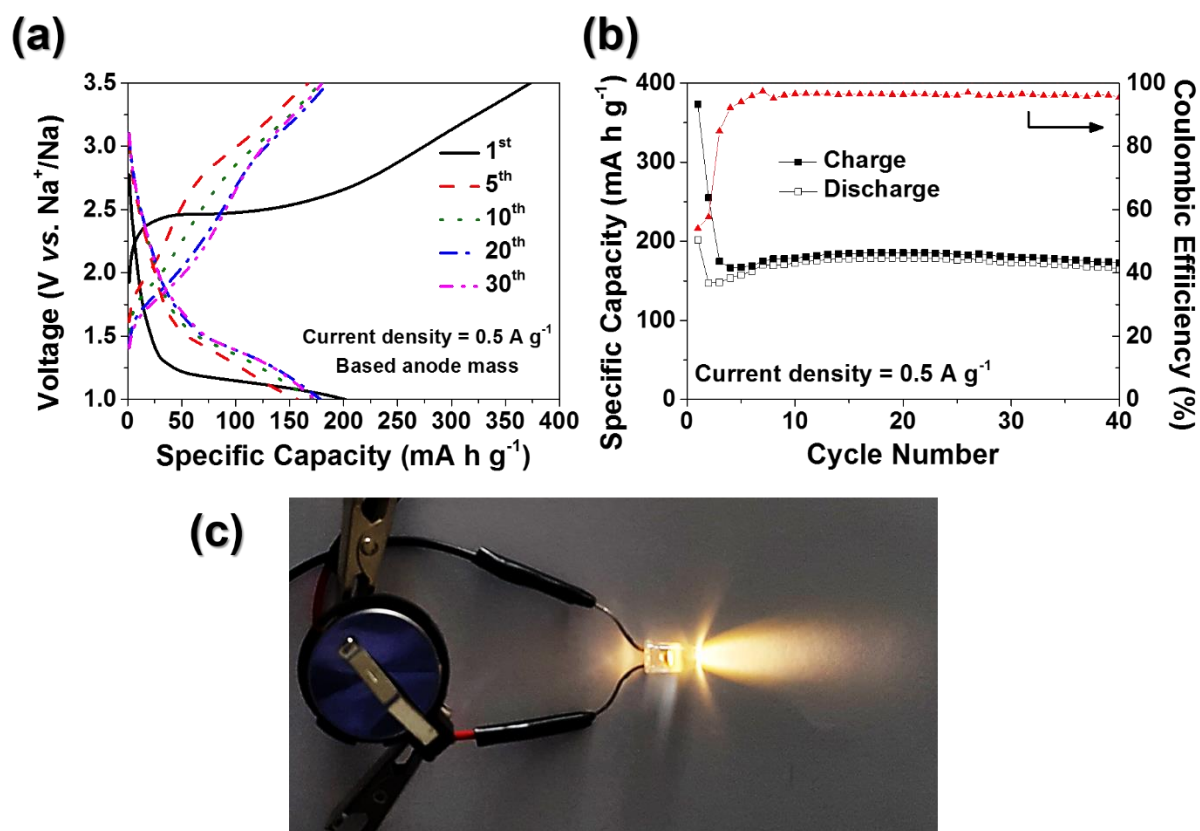

**Fig. S11** Electrochemical properties of a Na-ion full cell of anode (Co(NiCo)Se<sub>2</sub>)/cathode (Na<sub>3</sub>V<sub>2</sub>(PO<sub>4</sub>)<sub>3</sub>/carbon): (a) charge-discharge curves, (b) cycling performance at a current density of 0.5 A g<sup>-1</sup> based on the anode mass, and (c) digital photograph of an LED diode powered by the fabricated Na-ion full cell.

**Table S1.** Electrochemical properties of various nanostructured CoSe<sub>x</sub> and NiSe<sub>x</sub> materials applied as sodium-ion batteries reported in the previous literatures.

| Materials                             | Voltage range (V) | Current rate           | Initial discharge/charge capacities [mA h g <sup>-1</sup> ] | Discharge capacity [mA h g <sup>-1</sup> ] and (cycle number) | Rate capacity [mA h g <sup>-1</sup> ] | Ref      |
|---------------------------------------|-------------------|------------------------|-------------------------------------------------------------|---------------------------------------------------------------|---------------------------------------|----------|
| Co/(NiCo)Se <sub>2</sub> nanocubes    | 0.001-3           | 200 mA g <sup>-1</sup> | 661/526                                                     | 497 (80)                                                      | 470 (5.0 A g <sup>-1</sup> )          | Our work |
| Hollow CoSe <sub>2</sub> microspheres | 0.001-3           | 500 mA g <sup>-1</sup> | 595/498                                                     | 467 (40)                                                      | 446 (0.9 A g <sup>-1</sup> )          | [1]      |
| CoSe <sub>x</sub> -rGO composites     | 0.001-3           | 300 mA g <sup>-1</sup> | 656/459                                                     | 420 (50)                                                      | 357 (1.0 A g <sup>-1</sup> )          | [2]      |
| CoSe@porous carbon polyhedra          | 0.005-3           | 100 mA g <sup>-1</sup> | 504/340.2                                                   | 341 (100)                                                     | 208 (4.0 A g <sup>-1</sup> )          | [3]      |
| Co <sub>9</sub> Se <sub>8</sub> /rGO  | 0.01-3            | 50 mA g <sup>-1</sup>  | 670/440                                                     | 406 (100)                                                     | 295 (5.0 A g <sup>-1</sup> )          | [4]      |
| N-doped yolk-shell CoSe/C             | 0.01-3            | 500 mA g <sup>-1</sup> | 850/x                                                       | 531.6 (50)                                                    | 457 (6.4 A g <sup>-1</sup> )          | [5]      |
| NiSe <sub>2</sub> -rGO-C nanofibers   | 0.001-3           | 200 mA g <sup>-1</sup> | 755/575                                                     | 468 (100)                                                     | 243 (3.0 A g <sup>-1</sup> )          | [6]      |
| NiSe <sub>2</sub> nanoplates          | 0.005-3           | 100 mA g <sup>-1</sup> | 1008/517                                                    | 400 (80)                                                      | 249 (5.0 A g <sup>-1</sup> )          | [7]      |
| Core-shell NiSe/C                     | 0.01-3            | 100 mA g <sup>-1</sup> | 480/355                                                     | 280 (100)                                                     | 186 (0.5 A g <sup>-1</sup> )          | [8]      |

**Table S2.** Electrocatalytic activity for HER of various nanostructured CoSe<sub>x</sub> and NiSe<sub>x</sub> materials.

| Materials                                              | Electrolyte                         | Tafel slope<br>[mV dec <sup>-1</sup> ]           | Overpotential at current<br>density = 10 mA cm <sup>-2</sup><br>[mV] | Ref      |
|--------------------------------------------------------|-------------------------------------|--------------------------------------------------|----------------------------------------------------------------------|----------|
| Co/(NiCo)Se <sub>2</sub> nanocubes                     | 0.5M H <sub>2</sub> SO <sub>4</sub> | 39.8                                             | 190                                                                  | Our work |
| CoSe <sub>2</sub> & NiSe <sub>2</sub> nanocrystals     | 0.5M H <sub>2</sub> SO <sub>4</sub> | CoSe <sub>2</sub> (40)<br>NiSe <sub>2</sub> (44) | CoSe <sub>2</sub> (160)<br>NiSe <sub>2</sub> (190)                   | [9]      |
| CoSe <sub>2</sub> thin film                            | 0.5M H <sub>2</sub> SO <sub>4</sub> | 55                                               | 327                                                                  | [10]     |
| CoSe <sub>2</sub> nanoparticles coated on carbon black | 0.5M H <sub>2</sub> SO <sub>4</sub> | 42                                               | 200                                                                  | [11]     |
| CoSe <sub>2</sub> @defective CNT                       | 0.5M H <sub>2</sub> SO <sub>4</sub> | 82                                               | 132                                                                  | [12]     |
| NiCoSe <sub>2</sub> nanowire on carbon cloth           | 0.5M H <sub>2</sub> SO <sub>4</sub> | 40.1                                             | 131                                                                  | [13]     |
| Sea urchin-like NiSe                                   | 0.5M H <sub>2</sub> SO <sub>4</sub> | 64                                               | ~280                                                                 | [14]     |
| Nanocrystalline Ni <sub>0.85</sub> Se                  | 0.5M H <sub>2</sub> SO <sub>4</sub> | 49.3                                             | ~240                                                                 | [15]     |
| CoMoS <sub>3</sub> prisms                              | 0.5M H <sub>2</sub> SO <sub>4</sub> | 56.9                                             | ~170                                                                 | [16]     |

## References

1. Y. N. Ko, S. H. Choi and Y. C. Kang, *ACS Appl. Mater. Interfaces*, 2016, **8**, 6449-6456.
2. G. D. Park and Y. C. Kang, *Chem.-Eur. J.*, 2016, **22**, 4140-4146.
3. J. Li, D. Yan, T. Lu, Y. Yao and L. Pan, *Chem. Eng. J.*, 2017, **325**, 14-24.
4. X. Wang, D. Kong, Z. X. Huang, Y. Wang and H. Y. Yang, *Small*, 2017, DOI: 10.1002/sml.201603980.
5. Y. Zhang, A. Pan, L. Ding, Z. Zhou, Y. Wang, S. Niu, S. Liang and G. Cao, *ACS Appl. Mater. Interfaces*, 2017, **9**, 3624-3633.
6. J. S. Cho, S. Y. Lee and Y. C. Kang, *Sci Rep*, 2016, **6**, 23338.
7. H. Fan, H. Yu, X. Wu, Y. Zhang, Z. Luo, H. Wang, Y. Guo, S. Madhavi and Q. Yan, *ACS Appl. Mater. Interfaces*, 2016, **8**, 25261-25267.
8. Z. Zhang, X. Shi and X. Yang, *Electrochim. Acta*, 2016, **208**, 238-243.
9. I. H. Kwak, H. S. Im, D. M. Jang, Y. W. Kim, K. Park, Y. R. Lim, E. H. Cha and J. Park, *ACS Appl. Mater. Interfaces*, 2016, **8**, 5327-5334.

10. C. L. McCarthy, C. A. Downes, E. C. Schueller, K. Abuyen and R. L. Brutchey, *ACS Energy Lett.*, 2016, **1**, 607-611.
11. D. Kong, J. J. Cha, H. Wang, H. R. Lee and Y. Cui, *Energy Environ. Sci.*, 2013, **6**, 3553.
12. W. Zhou, J. Lu, K. Zhou, L. Yang, Y. Ke, Z. Tang and S. Chen, *Nano Energy*, 2016, **28**, 143-150.
13. Z. Zhang, Y. Liu, L. Ren, H. Zhang, Z. Huang, X. Qi, X. Wei and J. Zhong, *Electrochim. Acta*, 2016, **200**, 142-151.
14. M.-R. Gao, Z.-Y. Lin, T.-T. Zhuang, J. Jiang, Y.-F. Xu, Y.-R. Zheng and S.-H. Yu, *J. Mater. Chem.*, 2012, **22**, 13662.
15. B. Yu, Y. Hu, F. Qi, X. Wang, B. Zheng, K. Liu, W. Zhang, Y. Li and Y. Chen, *Electrochim. Acta*, 2017, **242**, 25-30.
16. L. Yu, B. Y. Xia, X. Wang and X. W. Lou, *Adv. Mater.*, 2016, **28**, 92-97.
